# Supplementary material for: High Frequency of Mayaro Virus IgM among Febrile Patients, Central Brazil
Source: PubMed Central journal article supplement (PMC5443426; doi:10.3201/eid2306.160929), 2017-06
Supplement: 16-0929-Techapp-s1.pdf [file 16-0929-Techapp-s1.pdf]

# High Frequency of Mayaro Virus IgM among Febrile Patients, Central Brazil

## Technical Appendix

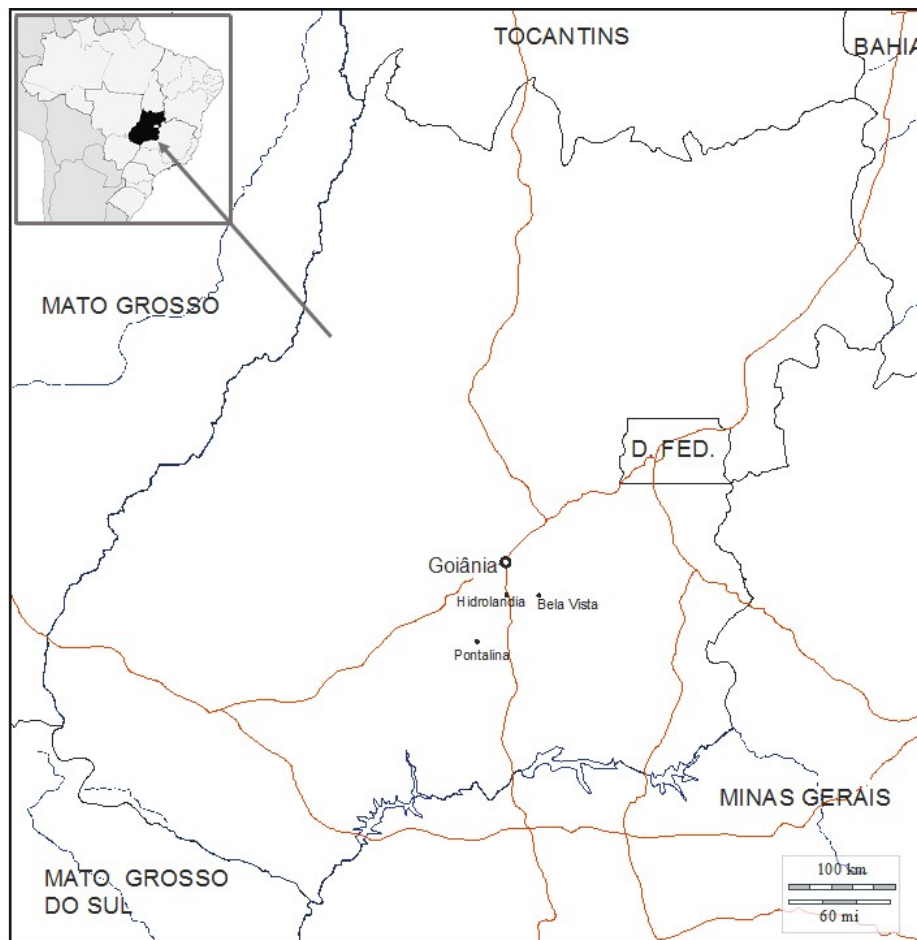

**Technical Appendix Figure.** Goiânia, Goiás, Brazil, and the area where most cases of Mayaro virus infection were detected, June 1, 2014–June 30, 2015.
